# Supplementary material for: Tillage Promotes the Migration and Coexistence of Bacteria Communities from an Agro-Pastoral Ecotone of Tibet
Source: MDPI journal article supplement (doi:10.3390/microorganisms10061206), 2022-06-13
Supplement: s1 [file s1]

**Tillage promotes the migration and coexistence of bacteria communities in an agro-pastoral ecotone of Tibet, China**

Yuhong Zhao <sup>a,1</sup>, Mingtao Wang <sup>a,1</sup>, Yuyi Yang <sup>b,c</sup>, Peng Shang <sup>a</sup>, Weihong Zhang <sup>b,c\*</sup>

<sup>a</sup> Tibet Agricultural and Animal Husbandry University, Nyingchi, 860000, China

<sup>b</sup> Key Laboratory of Aquatic Botany and Watershed Ecology, Wuhan Botanical Garden, Chinese Academy of Sciences, Wuhan, 430074, China

<sup>c</sup> University of Chinese Academy of Sciences, Beijing 100049, China

<sup>1</sup> The authors make equal contributions to this manuscript.

Corresponding author

Dr. Weihong Zhang (zhangweihong@wbgcas.cn)

Address: Wuhan Botanical Garden, Lumo Road No.1, Wuchang District, Wuhan, P.R.

China. Phone: +86-27-87700853; Fax: +86-27-87510251.

**Table S1.** The alpha diversity indexes of the bacterial community in cropland and grassland.

|                 |     | Chao1  | Shannon | Goods<br>coverage | Simpson | Pielou evenness<br>index | Observed<br>species |
|-----------------|-----|--------|---------|-------------------|---------|--------------------------|---------------------|
| Cropland        | WL1 | 3918.4 | 11.0    | 0.9892            | 0.9991  | 0.9222                   | 3841.6              |
|                 | WL2 | 4307.0 | 11.0    | 0.9815            | 0.9991  | 0.9199                   | 4042.5              |
|                 | WL3 | 3487.2 | 10.8    | 0.9886            | 0.9989  | 0.9195                   | 3352.2              |
|                 | CP1 | 3341.3 | 10.5    | 0.9862            | 0.9987  | 0.9036                   | 3139.0              |
|                 | CP2 | 4009.3 | 10.8    | 0.9820            | 0.9989  | 0.9104                   | 3706.6              |
|                 | CP3 | 4272.0 | 10.9    | 0.9799            | 0.9990  | 0.9125                   | 3891.8              |
| Grassland       | NG1 | 4496.8 | 10.9    | 0.9799            | 0.9988  | 0.9059                   | 4251.9              |
|                 | NG2 | 3802.3 | 10.7    | 0.9878            | 0.9986  | 0.9012                   | 3703.3              |
|                 | NG3 | 4212.9 | 10.8    | 0.9831            | 0.9986  | 0.8987                   | 4043.9              |
|                 | EG1 | 3873.9 | 10.9    | 0.9857            | 0.9989  | 0.9192                   | 3692.6              |
|                 | EG2 | 4894.9 | 11.2    | 0.9768            | 0.9991  | 0.9228                   | 4457.4              |
|                 | EG3 | 4227.6 | 11.1    | 0.9837            | 0.9991  | 0.9269                   | 3955.5              |
| <i>p</i> -value |     | 0.15   | 0.39    | 0.46              | 0.49    | 0.70                     | 0.09                |

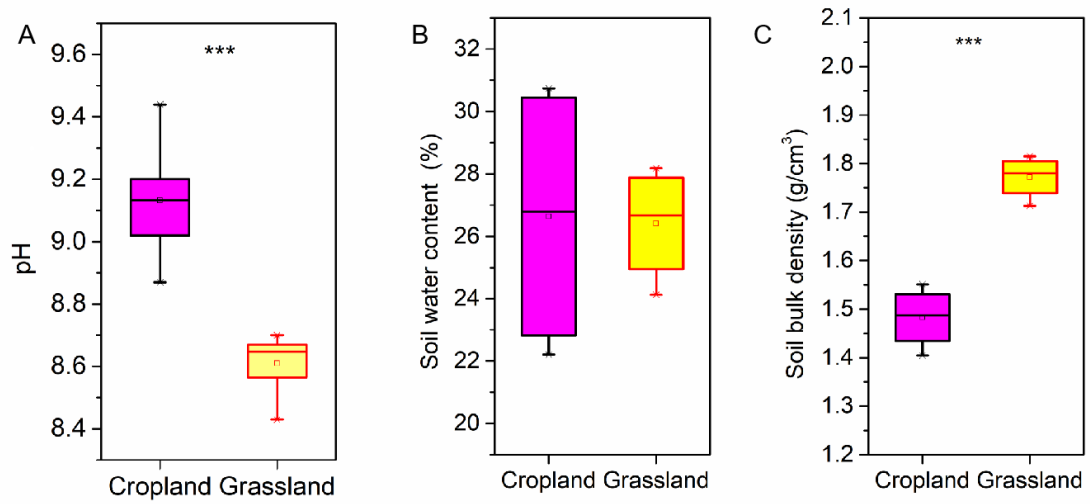

**Figure S1.** The difference of soil physicochemical properties between cropland and grassland via independent-samples T-test. \*\*\* showed a significant difference at the 0.001 level.

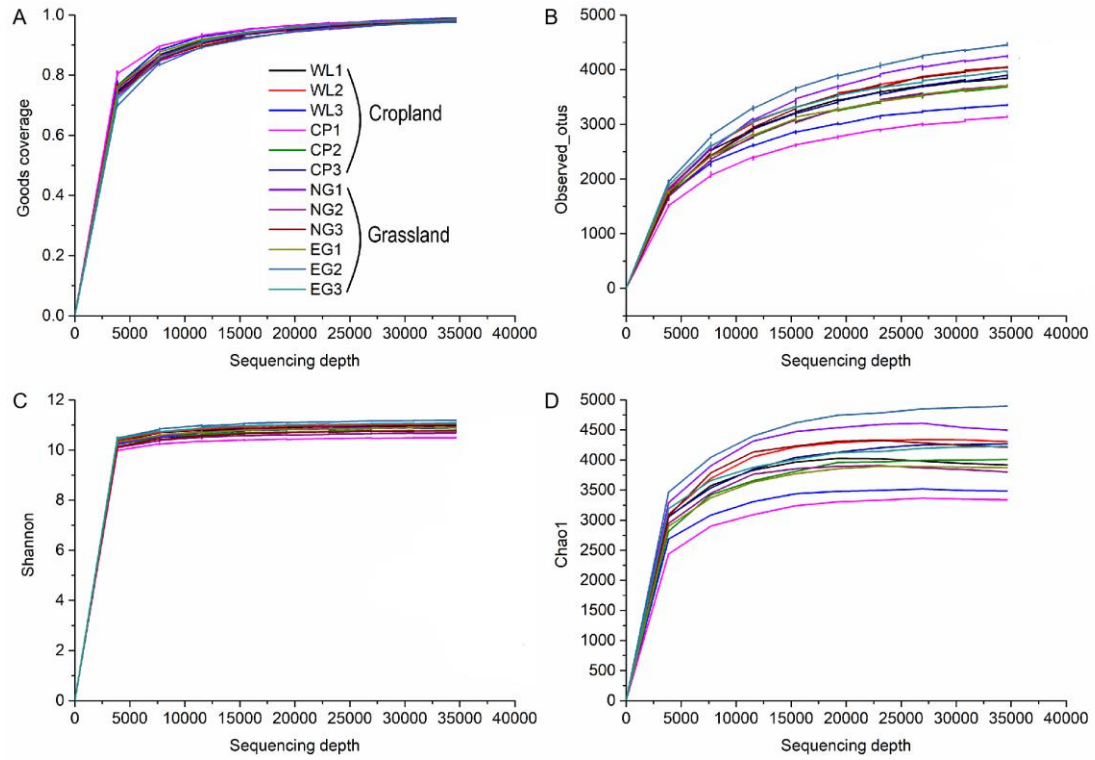

**Figure S2.** The rarefaction curves of Good's coverage (Fig. S2A), observed OTUs number (Fig. S2B), Shannon (Fig. S2C), and Chao1 (Fig. S2D) of the bacterial communities in cropland and grassland.

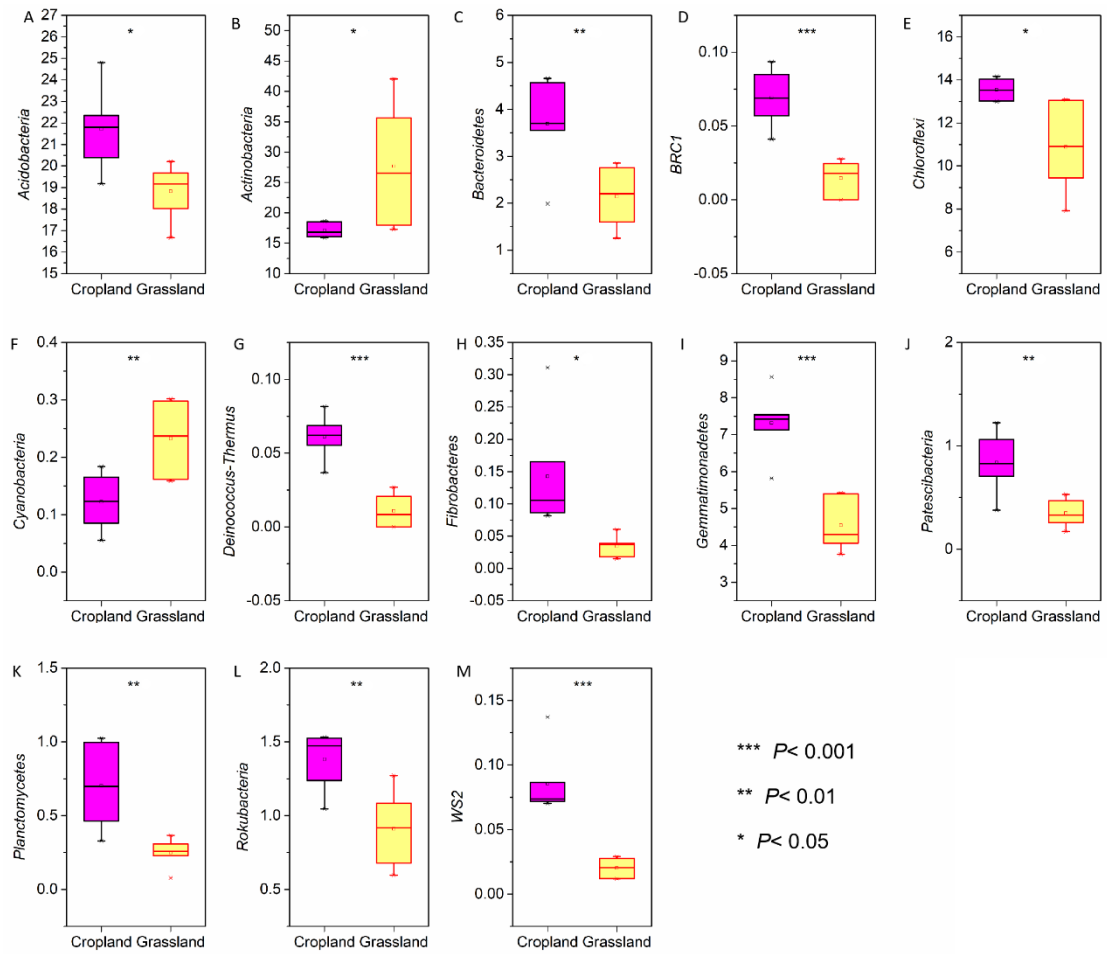

**Figure S3.** The difference analysis of bacterial communities between the cropland and grassland at the phylum level via independent sample t-test. The \*\*\* was a significant difference in the bacteria between cropland and grassland at the  $p < 0.001$  level, the \*\* was a significant difference at the  $p < 0.01$  level, and the \* was a significant difference at the  $p < 0.05$  level.
